# Supplementary material for: High adjuvant activity of layered double hydroxide nanoparticles and nanosheets in anti-tumour vaccine formulations
Source: Royal Society of Chemistry journal article supplement (doi:10.1039/c7dt03725b), 2017-11-08
Supplement: c7dt03725b1.pdf [file c7dt03725b1.pdf]

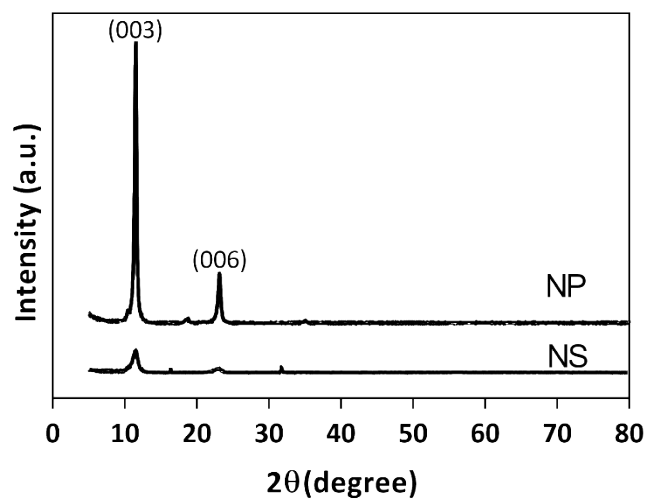

Fig. S1. XRD patterns of LDH NPs and LDH NSs.

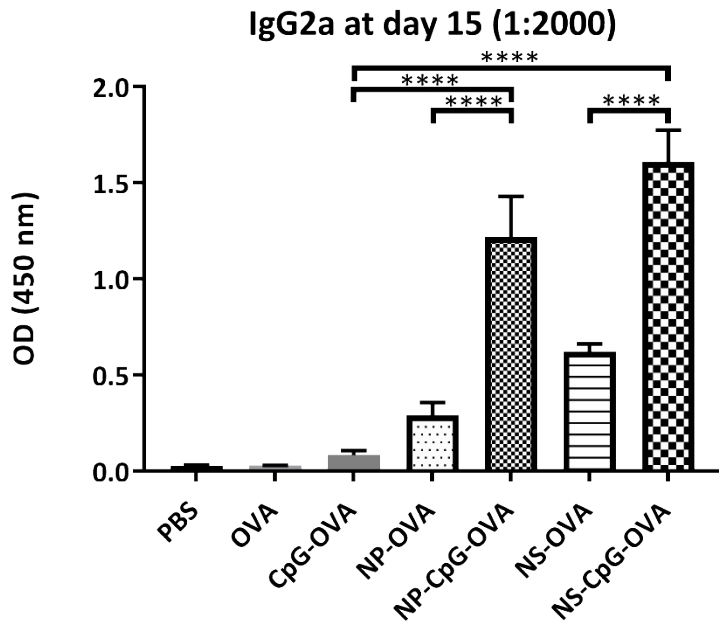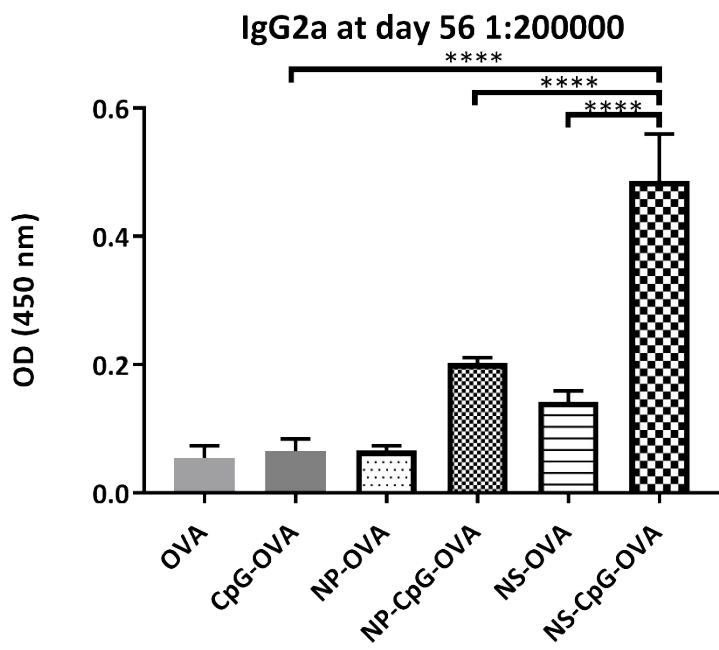

Fig. S2. Anti-OVA IgG2a level (n = 6, mean  $\pm$  S.E.M) at day 15 and 56 in C57BL/6 female mice immunised twice with OVA assembled on LDH NPs or LDH NSs with or without CpG.
